# Supplementary material
Source: PubMed Central journal article supplement (PMC3964376)
Supplement: 10-1055-s-0032-1328381-sup_gf610de.pdf [file 10-1055-s-0032-1328381-sup_gf610de.pdf]

# S3-Leitlinie „Umgang mit Patienten mit nicht-spezifischen, funktionellen und somatoformen Körperbeschwerden“ – Was ist bedeutend für die gynäkologische Praxis?

S3 Guideline “Management of Patients with Non-Specific, Functional and Somatoform Physical Complaints” – What is Important for Gynaecological Practice?

## Autoren

F. Siedentopf<sup>1</sup>, C. Hausteiner-Wiehle<sup>2</sup>

## Institute

<sup>1</sup> Martin-Luther-Krankenhaus, Frauenklinik, Berlin

<sup>2</sup> Berufsgenossenschaftliche Klinik Murnau, Klinik und Poliklinik für Psychosomatische Medizin der Technischen Universität, München

## Schlüsselwörter

- Gynäkologie
- somatoforme Körperbeschwerden
- psychosomatische Grundversorgung
- chronischer Unterbauchschmerz der Frau

## Key words

- gynaecology
- somatoform physical complaints
- primary psychosomatic care
- chronic pelvic pain in women

## Zusammenfassung

Bei der Erstellung der Leitlinie war die Evidenzlage heterogen und erreichte bei vielen Fragen nur mittleren Evidenzlevel; starker Konsens wurde jedoch fast durchgehend erzielt. Empfohlen werden der Aufbau einer partnerschaftlichen Arbeitsbeziehung, eine symptom-/bewältigungsorientierte Grundhaltung und das Vermeiden stigmatisierender Kommentare. Biopsychosoziale Simultandiagnostik mit behutsamem Aufgreifen von Hinweisen auf psychosoziale Belastungen ermöglicht die Früherkennung einschließlich komorbider Erkrankungen und verringert das Risiko iatrogenen Somatisierung. Bei leichteren Verläufen helfen das Erarbeiten eines biopsychosozialen Erklärungsmodells und körperliche/soziale Aktivierung. Schwerere Verläufe erfordern ein kooperatives, koordiniertes Vorgehen mit regelmäßigen Terminen, gestufter Aktivierung und Psychotherapie. Innerhalb eines Gesamtbehandlungsplans bis hin zu multimodaler Therapie können körperorientierte und Entspannungsverfahren sowie antidepressive Medikation sinnvoll sein.

## Abstract

When the guideline was compiled, the available evidence was heterogeneous; the evidence varied depending on the subject addressed and was often of only moderate quality. Nevertheless, a strong consensus was reached on almost all subjects. It is recommended that physicians develop a collaborative working relationship with the patient, focus on symptoms and coping strategies and avoid making stigmatising comments. A biopsychosocial diagnostic evaluation with a sensitive discussion of the signs of psychosocial stress allows problems of this type and co-morbid conditions to be recognised early on and reduces the risk of iatrogenic somatisation. In uncomplicated cases, establishing a biopsychosocial explanatory model and physical/social activation are recommended. More serious cases call for collaborative, coordinated management with regular appointments (as opposed to ad-hoc appointments when the patient feels worse), gradual activation and psychotherapy. The comprehensive treatment plan can be multimodal and can potentially include physical management strategies, relaxation techniques and antidepressants.

## Einleitung

Die Leitlinie zum Umgang mit nicht-spezifischen, funktionellen und somatoformen Körperbeschwerden gibt fächerübergreifende und praxisorientierte Empfehlungen, die ein biopsychosoziales Krankheitsverständnis fördern sowie Früherkennung, Prävention und Therapie verbessern. Bei der Erstellung der Leitlinie war die Evidenzlage wegen der weit gespannten Thematik heterogen und erreichte bei vielen Fragen nur mittlere Evidenzlevel; allerdings wurde unter den 30 beteiligten Fachgesellschafts- und Patientenvertretern fast durchgehend starker Konsens erzielt [1–3].

Leitsymptome sind Schmerzen unterschiedlicher Lokalisation, gestörte Organfunktionen (Verdauung, Herz/Kreislauf, Atmung, Urogenitalsystem) einschließlich vegetativer Beschwerden sowie Erschöpfung/Müdigkeit [4], prinzipiell sind aber Beschwerden in jedem Organsystem möglich. Viele somatische Disziplinen haben deshalb eigene funktionelle Syndrome formuliert; im Bereich der Frauenheilkunde gehören dazu vor allem der chronische Unterbauchschmerz, Vulvodynie, chronischer vaginaler Pruritus/chronischer vaginaler Fluor, Dysmenorrhö und Dyspareunie. Aktuelle ätiopathogenetische Modelle gehen von komplexen Wechselwirkungen psychosozialer,

## Bibliografie

**DOI** <http://dx.doi.org/10.1055/s-0032-1328381>  
Geburtsh Frauenheilk 2013; 73: 1–3 © Georg Thieme Verlag KG Stuttgart · New York · ISSN 0016-5751

## Korrespondenzadresse

**Dr. med. Friederike Siedentopf**  
Martin-Luther-Krankenhaus,  
Frauenklinik  
Caspar-Thyß-Straße 27–31  
14193 Berlin  
[friederike.siedentopf@gmx.de](mailto:friederike.siedentopf@gmx.de)

biologischer, iatrogener/medizinsystemischer und soziokultureller Faktoren aus, die zu neurobiologischen Veränderungen führen können und bei Disposition, Auslösung und Chronifizierung der Beschwerden zusammenspielen [1–5].

### Haltung und Gesprächsführung: Empathisch, biopsychosozial und bewältigungsorientiert

Die Grundhaltung sollte sich um ein einführendes Verstehen der Beschwerden im Lebenskontext der Patientin, um eine konsequente Berücksichtigung sowohl somatischer als auch psychosozialer Faktoren und um eine Verbesserung von Lebensqualität und Leistungsfähigkeit (anstatt unbedingt um eine Aufklärung und Beseitigung der Beschwerden) bemühen [1–3]. Behandler sollten eine positive Beschreibung der Beschwerden anbieten (zum Beispiel „nicht-spezifisch“, „funktionell“, „körperlicher Stress“, gegebenenfalls eine entsprechende Diagnose), aber keine verharmlosenden Kommentare („Sie haben nichts“) oder stigmatisierenden Begriffe („Hysterie“) verwenden [1–3, 6, 7]. Wesentlich sind die Beruhigung, dass ein gefährlicher Verlauf unwahrscheinlich ist und ungeeignete Maßnahmen unterbleiben sollten („nil nocere“) [1–3, 8, 9]. Es werden offene Fragen empfohlen, die es der Patientin überlassen, welche Aspekte sie zuerst schildert; sie fördern Gesprächsfluss, die Motivation zur Zusammenarbeit und signalisieren die Bereitschaft zu einem Arbeitsbündnis. Verbal und nonverbal sollten Aufmerksamkeit und Interesse gezeigt werden („aktives Zuhören“) [1–3].

### Diagnostik: Günstige Prognosefaktoren, Charakteristika schwererer und gefährlicher Verläufe

Entscheidend beim diagnostischen Vorgehen ist die biopsychosoziale Simultandiagnostik, bei der der psychosoziale Kontext erfragt und *gleichzeitig* die wesentlichen somatischen Differenzialdiagnosen ausgeschlossen werden [1–3]. Anamnestisch sollten vor allem weitere körperliche und psychische Beschwerden über das Leitsymptom hinaus, Trigger und Bewältigungsstrategien sowie das aktuelle Funktionsniveau im Alltag erfragt werden. Die somatische Diagnostik sollte gut geplant und nicht redundant sein und zwar regelmäßige körperliche Untersuchungen einschließen, unnötige und ggf. schädliche Maßnahmen jedoch vermeiden. Untersuchungen und Untersuchungsergebnisse sollten entkatastrophisierend besprochen werden.

Einige protektive Faktoren („green flags“) wirken sich wahrscheinlich prognostisch günstig aus und sollten erfasst und gefördert werden (► **Tab. 1**). Charakteristika für schwerere Verläufe („yellow flags“) (► **Tab. 2**) und Warnsignale für gefährliche Verläufe inklusive Suizidalität („red flags“) (► **Tab. 3**) sollten wiederholt eingeschätzt und das Vorgehen entsprechend angepasst werden [4].

Bei Diagnosestellung sollte auch die Möglichkeit wahrgenommen werden, funktionelle oder somatoforme Störungen als *Begleitdiagnosen* zu stellen.

### Allgemeine therapeutische Empfehlungen

Die Therapie soll entsprechend der klinischen Verlaufskarakteristika schweregradgestuft erfolgen [4, 12, 13]. Für die meisten Patientinnen mit nicht-spezifischen, funktionellen und somato-

**Tab. 1** Protektive Faktoren („green flags“) (nach [1–4, 10, 11]).

|                                                                                                                        |
|------------------------------------------------------------------------------------------------------------------------|
| aktive Bewältigungsstrategien (z. B. körperliches Training, positive Lebenseinstellung, Motivation für Psychotherapie) |
| gesunde Lebensführung (ausreichend Schlaf, ausgewogene Ernährung, Bewegung und Entspannung)                            |
| sichere Bindungen, soziale Unterstützung                                                                               |
| gute Arbeitsbedingungen                                                                                                |
| gelingende Behandler-Patient-Beziehung                                                                                 |
| biopsychosozialer, entkatastrophisierender Ansatz unter Vermeidung unnötiger Maßnahmen                                 |
| frei zugängliches, aber auf Selbstverantwortung und Prävention setzendes Gesundheitssystem                             |

**Tab. 2** Klinische Charakteristika schwererer Verläufe („yellow flags“) (nach [1–4, 10, 11]).

|                                                                                                           |
|-----------------------------------------------------------------------------------------------------------|
| mehrere Beschwerden (polysymptomatischer Verlauf)                                                         |
| keine oder nur seltene/kurze beschwerdefreie Intervalle                                                   |
| starke Krankheitsängste                                                                                   |
| hohes, dysfunktionales Inanspruchnahmeverhalten von Gesundheitsleistungen, Schon- u. Vermeidungsverhalten |
| Arbeitsunfähigkeit > 4 Wochen, sozialer Rückzug                                                           |
| hohe Belastungen in Lebenssituation und Biografie                                                         |
| schwerere psychische Komorbidität (Depression, Angst, PTSD, Sucht, Persönlichkeitsstörung)                |
| Arzt-Patient-Beziehung (von beiden) als „schwierig“ erlebt, frustrierend, häufige Behandlungsabbrüche     |
| iatrogene Somatisierung (z. B. Katastrophisieren, nicht indizierte invasive Maßnahmen)                    |

**Tab. 3** Warnsignale abwendbar gefährlicher Verläufe („red flags“) (nach [1–4, 10, 11]).

|                                                                                                                                                       |
|-------------------------------------------------------------------------------------------------------------------------------------------------------|
| Suizidalität                                                                                                                                          |
| besonders schwere psychische Komorbidität (z. B. schwere depressive Episode, Angstsymptomatik, die den Patienten das Haus nicht mehr verlassen lässt) |
| Hinweise auf ernstes selbstschädigendes (Drängen auf Operationen) und/oder iatrogen schädigendes Verhalten                                            |
| schwerste Ausprägung der Beschwerden und körperliche Folgeschäden: Fixierung von Fehlhaltungen, starke Gewichtszunahme, Einschränkung der Mobilität   |
| Auftreten bekannter Warnsignale somatisch definierter Erkrankungen (siehe Leitlinien somatischer Fächer)                                              |

formen Körperbeschwerden ist in der Regel die Hausarztpraxis die erste Anlaufstelle [14, 15], bei organsystembezogenen Beschwerden aus dem gynäkologischen Bereich aber meist der Frauenarzt bzw. die Frauenärztin (Stichwort: „Hausarzt der Frau“). Bei relevanter psychischer und somatischer Komorbidität sollte deren leitliniengerechte Behandlung erfolgen.

Bei leichteren Verläufen helfen oft schon das Erarbeiten eines biopsychosozialen Erklärungsmodells und die körperliche/soziale Aktivierung. Beschwerden und Befunde sollten anschaulich und rückversichernd erklärt und dabei psychophysiologische Zusammenhänge vermittelt werden (Psychoedukation: z. B. Stressphysiologie, Teufelskreismodelle). Dabei sollte an die subjektive Krankheitstheorie des Patienten angeknüpft und ein biopsychosoziales Erklärungsmodell aufgebaut werden [1].

Schwerere Verläufe erfordern zusätzlich eine längerfristige Begleitung in Form eines kooperativen, koordinierten Vorgehens mit regelmäßigen und vor allem auch beschwerdeunabhängigen

Gesprächsterminen, gestufter körperlicher, aber auch sozialer Aktivierung und Psychotherapie (mit breiter Datenbasis und mittleren Effektstärken für kognitiv-behaviorale, daneben psychodynamisch-interpersonelle und hypnotherapeutische/imaginative Ansätze). Innerhalb eines Gesamtbehandlungsplans bis zu multimodaler Therapie können körperorientierte/non-verbale und Entspannungsverfahren (idealerweise aktivierende Techniken, die auch selbst zuhause durchgeführt werden können) sowie befristete Medikation sinnvoll sein; bei Schmerzdominanz sollte ein Behandlungsversuch mit Antidepressiva erfolgen.

Grundlage der Therapie durch somatische Ärzte und eben auch den/die Gynäkologen/in sollte die „Psychosomatische Grundversorgung“ und – wenn eine entsprechende Qualifikation vorliegt – die fachgebundene Psychotherapie sein [1].

In **Tab. 4** werden typische Indikationen für eine stationäre Therapie aufgrund von klinischen Verläufen dargestellt (klinische Einzelfallentscheidung!).

### Schlussfolgerung

Schlussfolgernd lässt sich sagen, dass eine konsequente biopsychosoziale Simultandiagnostik die Früherkennung ermöglicht und durch eine reflektierte Gesprächsführung und Planung der Diagnostik eine zusätzliche „iatrogene Somatisierung“ vermieden werden kann. Die Therapie orientiert sich an der Erkrankungsschwere und sollte vom Gynäkologen (als dem „Hausarzt der Frau“) koordiniert werden. Sie erfordert aktive Mitarbeit der Patientin und Kooperation aller beteiligter Behandler.

Die Langfassung der Leitlinie enthält neben allen Hintergrundkommentaren und Quellen auch zahlreiche konkrete Praxis- und Formulierungstipps. Die zugehörige Patientenleitlinie legt sowohl in ihrer Kurz- als auch ihrer Langfassung einen Schwerpunkt auf Information und geeignete Selbsthilfemaßnahmen: [www.awmf.org/leitlinien/detail/II/051-001.html](http://www.awmf.org/leitlinien/detail/II/051-001.html)

**Tab. 4** Typische Indikationen für eine stationäre Therapie [2, 3].

|                                                                                                                                                                                                                                                |
|------------------------------------------------------------------------------------------------------------------------------------------------------------------------------------------------------------------------------------------------|
| Selbst- oder Fremdgefährdung einschließlich Suizidalität (absolute Indikation), Notwendigkeit ständiger ärztlicher Präsenz bei möglichen Krisen                                                                                                |
| schwere körperliche Symptome beziehungsweise starke somatische Komorbidität, schwere psychische Symptome beziehungsweise ausgeprägte psychische Komorbidität                                                                                   |
| längerfristige Arbeitsunfähigkeit (mindestens 4 Wochen) und Gefährdung der Erwerbsfähigkeit, geringe soziale Unterstützung beziehungsweise große Konflikte im familiären/beruflichen Umfeld oder sonstige relevante sozialmedizinische Aspekte |
| nicht hinreichende Behandlungsmotivation beziehungsweise fehlende Belastbarkeit für den ambulanten Therapieprozess, rein somatisches Krankheitsverständnis                                                                                     |
| hohe biografische Belastung                                                                                                                                                                                                                    |
| große interaktionelle Probleme in der Behandler-Patient-Beziehung                                                                                                                                                                              |
| ausbleibender Erfolg der ambulanten Behandlung nach 6 Monaten (eine [teil-]stationäre Therapie sollte erwogen werden, wenn 2-mal die alle 3 Monate empfohlene Verlaufsevaluation einen ausbleibenden Therapieerfolg ergeben hat)               |
| logistische oder Verfügbarkeitsprobleme, eine multimodale/multiprofessionelle (Differenzial-)Diagnostik und Behandlung zu gewährleisten                                                                                                        |
| Notwendigkeit von Therapieplanänderungen beziehungsweise -anpassungen sowie Verlaufsbeobachtungen im multiprofessionellen Team unter fachärztlicher Behandlungsregie, Notwendigkeit eines Stationsmilieus als veränderter Rahmen               |
| Wunsch der Patientin                                                                                                                                                                                                                           |

### Danksagung

Wir danken den übrigen Autoren der Leitlinien-Kurzfassung, die im November 2012 im Deutschen Ärzteblatt erschienen ist [1] (Rainer Schaefer, Winfried Häuser, Joram Ronel, Markus Herrmann und Peter Henningsen), dass sich dieser Artikel daran orientieren durfte, und ebenso allen weiteren an der Erstellung der Langfassung der Leitlinie Beteiligten.

### Interessenkonflikt

C. Hausteiner-Wiehle: Nein.  
F. Siedentopf hat Vortragshonorare der Firmen Roche, Glaxo-SmithKline und Dr. Kade-Besins erhalten.

### Literatur

- Schaefer R, Hausteiner-Wiehle C, Häuser W et al. Clinical Practice Guideline: Non-specific, functional and somatoform bodily complaints. Dtsch Arztebl Int 2012; 109: 803–813
- Hausteiner-Wiehle C, Schaefer R, Sattel H et al. AWMF-Leitlinie zum Umgang mit Patienten mit nicht-spezifischen, funktionellen und somatoformen Körperbeschwerden. AWMF-Reg.-Nr. 051-001 2012. [www.awmf.org/leitlinien/detail/II/051-001.html](http://www.awmf.org/leitlinien/detail/II/051-001.html); Stand: 25.2.2013
- Hausteiner-Wiehle C, Henningsen P, Häuser W et al. Umgang mit Patienten mit nicht-spezifischen, funktionellen und somatoformen Körperbeschwerden. S3-Leitlinien mit Quellentexten und Praxismaterialien. Stuttgart: Schattauer; 2013; in press
- Henningsen P, Zipfel S, Herzog W. Management of functional somatic syndromes. Lancet 2007; 369: 946–955
- Witthöft M, Hiller W. Psychological approaches to origins and treatments of somatoform disorders. Annu Rev Clin Psychol 2010; 6: 257–283
- Dowrick CF, Ring A, Humphris GM et al. Normalisation of unexplained symptoms by general practitioners: a functional typology. Br J Gen Pract 2004; 54: 165–170
- Stone J, Wojcik W, Durrance D et al. What should we say to patients with symptoms unexplained by disease? The “number needed to offend”. BMJ 2002; 325: 1449–1450
- Fink P, Rosendal M, Toft T. Assessment and treatment of functional disorders in general practice: the extended reattribution and management model – an advanced educational program for nonpsychiatric doctors. Psychosomatics 2002; 43: 93–131
- van Bokhoven MA, Koch H, van der Weijden T et al. Influence of watchful waiting on satisfaction and anxiety among patients seeking care for unexplained complaints. Ann Fam Med 2009; 7: 112–120
- Kirmayer LJ, Robbins JM. Three forms of somatization in primary care: prevalence, co-occurrence, and sociodemographic characteristics. J Nerv Ment Dis 1991; 179: 647–655
- Smith RC, Dwamena FC. Classification and diagnosis of patients with medically unexplained symptoms. J Gen Intern Med 2007; 22: 685–691
- van der Feltz-Cornelis CM, Hoedeman R, Keuter EJ et al. Presentation of the Multidisciplinary Guideline Medically Unexplained Physical Symptoms (MUPS) and Somatoform Disorder in the Netherlands: disease management according to risk profiles. J Psychosom Res 2012; 72: 168–169
- Gask L, Dowrick C, Salmon P et al. Reattribution reconsidered: narrative review and reflections on an educational intervention for medically unexplained symptoms in primary care settings. J Psychosom Res 2011; 71: 325–334
- Steinbrecher N, Koerber S, Frieser D et al. The prevalence of medically unexplained symptoms in primary care. Psychosomatics 2011; 52: 263–271
- Nanke A, Rief W. Zur Inanspruchnahme medizinischer Leistungen bei Patienten mit somatoformen Störungen. Psychotherapeut 2003; 48: 329–335
